# Supplementary material for: Trimetazidine Attenuates Cardiac Dysfunction in Endotoxemia and Sepsis by Promoting Neutrophil Migration
Source: PubMed Central journal article supplement (PMC6131494; doi:10.3389/fimmu.2018.02015), 2018-09-04
Supplement: Data_Sheet_2.pdf [file Data_Sheet_2.pdf]

**Supplemental Table 1. Haemodynamic characteristics of animal groups.**

|                               | Con           | TMZ           | LPS            | LPS+TMZ                    | SB225002      | LPS+TMZ+SB225002          |
|-------------------------------|---------------|---------------|----------------|----------------------------|---------------|---------------------------|
| Heart rate (b.p.m.)           | 501.1 ± 7.39  | 494.3 ± 9.93  | 330.5 ± 12.27* | 459.3 ± 7.69 <sup>#</sup>  | 506.4 ± 3.88  | 364.3 ± 8.07 <sup>§</sup> |
| $P_{\max}$ (mmHg)             | 106.8 ± 3.28  | 107.9 ± 3.52  | 66.6 ± 2.67*   | 94.5 ± 1.86 <sup>#</sup>   | 108.8 ± 4.38  | 77.69 ± 1.31 <sup>§</sup> |
| EDP (mmHg)                    | 4.64 ± 0.31   | 4.63 ± 0.22   | 14.26 ± 1.32*  | 5.76 ± 0.30 <sup>#</sup>   | 4.70 ± 0.29   | 8.38 ± 0.75 <sup>§</sup>  |
| dP/dt <sub>max</sub> (mmHg/s) | 11747 ± 381.7 | 11799 ± 918.8 | 4949 ± 258.2*  | 8628 ± 209.3 <sup>#</sup>  | 11475 ± 897.9 | 5726 ± 324.6 <sup>§</sup> |
| dP/dt <sub>min</sub> (mmHg/s) | -6034 ± 142.4 | -5813 ± 365.9 | -3413 ± 260.3* | -5534 ± 188.2 <sup>#</sup> | -5737 ± 421.1 | -3713 ± 237 <sup>§</sup>  |

Values represent mean ± SEM; n =7-8 per group.

HR, heart rate; P<sub>max</sub>, peak systolic pressure; EDP, end diastolic pressure; dP/dt<sub>max</sub>, peak instantaneous rate of left ventricular pressure increase; dP/dt<sub>min</sub>, peak instantaneous rate of left ventricular pressure decline.

\* $p < 0.05$  Con group, <sup>#</sup> $p < 0.05$  LPS group, <sup>§</sup> $p < 0.05$  LPS+TMZ group.

**Supplemental Table 2. Primers for CXCR2 promoter constructs.**

| Constructs                | Sequences      | Forward or 5' primer  | Reverse or 3' primer  |
|---------------------------|----------------|-----------------------|-----------------------|
| CXCR2 promoter construct1 | (-3010) ~ +252 | CTGGGGATGTGATGGGAGAG  | TAGACATCGGTGACAGAGCAG |
| CXCR2 promoter construct2 | (-2318) ~ +252 | GGGGCATTATGGGCTGTAT   | TAGACATCGGTGACAGAGCAG |
| CXCR2 promoter construct3 | (-1407) ~ +252 | CTTTTATCCAACCAGCCACTT | TAGACATCGGTGACAGAGCAG |
